# Supplementary material for: Establishing Height-for-Age Z-Score Growth Reference Curves and Stunting Prevalence in Children and Adolescents in Pakistan
Source: MDPI journal article supplement (doi:10.3390/ijerph191912630), 2022-10-03
Supplement: s1 [file s1]

**Table S1.** Age-and- gender-specific smoothed height (cm) percentiles for the Pakistani children and adolescents, aged 2-18 years.

| Age<br>(years) | Percentiles     |                 |                  |                  |                  |                  |                  |                  |                  |
|----------------|-----------------|-----------------|------------------|------------------|------------------|------------------|------------------|------------------|------------------|
|                | 3 <sup>rd</sup> | 5 <sup>th</sup> | 10 <sup>th</sup> | 25 <sup>th</sup> | 50 <sup>th</sup> | 75 <sup>th</sup> | 90 <sup>th</sup> | 95 <sup>th</sup> | 97 <sup>th</sup> |
| <b>Boys</b>    |                 |                 |                  |                  |                  |                  |                  |                  |                  |
| 2              | 86.39           | 87.89           | 89.98            | 93.04            | 95.95            | 98.50            | 100.56           | 101.70           | 102.41           |
| 3              | 91.48           | 93.03           | 95.35            | 99.05            | 102.92           | 106.59           | 109.74           | 111.56           | 112.72           |
| 4              | 96.75           | 98.20           | 100.47           | 104.37           | 108.81           | 113.41           | 117.68           | 120.29           | 122.01           |
| 5              | 101.61          | 102.99          | 105.19           | 109.12           | 113.88           | 119.12           | 124.35           | 127.72           | 130.02           |
| 6              | 106.03          | 107.37          | 109.53           | 113.46           | 118.36           | 123.94           | 129.72           | 133.57           | 136.27           |
| 7              | 110.14          | 111.48          | 113.64           | 117.58           | 122.51           | 128.14           | 134.00           | 137.92           | 140.68           |
| 8              | 114.12          | 115.49          | 117.70           | 121.68           | 126.57           | 132.07           | 137.66           | 141.34           | 143.89           |
| 9              | 118.14          | 119.58          | 121.87           | 125.93           | 130.80           | 136.10           | 141.30           | 144.63           | 146.88           |
| 10             | 122.29          | 123.84          | 126.29           | 130.52           | 135.44           | 140.60           | 145.48           | 148.50           | 150.51           |
| 11             | 126.54          | 128.28          | 130.98           | 135.53           | 140.64           | 145.81           | 150.53           | 153.36           | 155.22           |
| 12             | 130.74          | 132.74          | 135.78           | 140.78           | 146.18           | 151.46           | 156.13           | 158.87           | 160.64           |
| 13             | 134.88          | 137.16          | 140.56           | 146.01           | 151.73           | 157.16           | 161.84           | 164.54           | 166.26           |
| 14             | 139.12          | 141.60          | 145.26           | 151.02           | 156.97           | 162.51           | 167.23           | 169.92           | 171.64           |
| 15             | 143.77          | 146.23          | 149.87           | 155.62           | 161.56           | 167.12           | 171.85           | 174.57           | 176.29           |
| 16             | 148.89          | 151.06          | 154.31           | 159.59           | 165.19           | 170.57           | 175.25           | 177.97           | 179.71           |
| 17             | 154.02          | 155.70          | 158.30           | 162.67           | 167.53           | 172.41           | 176.84           | 179.49           | 181.22           |
| 18             | 158.37          | 159.53          | 161.36           | 164.54           | 168.25           | 172.18           | 175.92           | 178.26           | 179.82           |
| <b>Girls</b>   |                 |                 |                  |                  |                  |                  |                  |                  |                  |
| 2              | 88.81           | 89.54           | 90.73            | 92.97            | 95.91            | 99.56            | 103.75           | 106.87           | 109.25           |
| 3              | 92.30           | 93.25           | 94.82            | 97.71            | 101.41           | 105.81           | 110.59           | 113.94           | 116.37           |
| 4              | 95.85           | 97.01           | 98.90            | 102.32           | 106.59           | 111.47           | 116.53           | 119.92           | 122.30           |
| 5              | 99.68           | 100.99          | 103.10           | 106.88           | 111.51           | 116.67           | 121.88           | 125.27           | 127.61           |
| 6              | 103.86          | 105.25          | 107.47           | 111.43           | 116.23           | 121.53           | 126.80           | 130.20           | 132.52           |
| 7              | 108.33          | 109.73          | 111.98           | 115.98           | 120.82           | 126.13           | 131.40           | 134.79           | 137.10           |
| 8              | 112.91          | 114.31          | 116.54           | 120.52           | 125.32           | 130.58           | 135.80           | 139.16           | 141.44           |
| 9              | 117.43          | 118.83          | 121.06           | 125.03           | 129.79           | 135.01           | 140.14           | 143.44           | 145.67           |
| 10             | 121.69          | 123.13          | 125.43           | 129.48           | 134.31           | 139.52           | 144.60           | 147.82           | 149.99           |
| 11             | 125.48          | 127.05          | 129.52           | 133.83           | 138.87           | 144.20           | 149.27           | 152.43           | 154.54           |
| 12             | 128.71          | 130.48          | 133.24           | 137.96           | 143.33           | 148.84           | 153.94           | 157.04           | 159.08           |
| 13             | 131.40          | 133.43          | 136.54           | 141.74           | 147.47           | 153.17           | 158.29           | 161.34           | 163.32           |
| 14             | 133.73          | 136.01          | 139.45           | 145.08           | 151.10           | 156.93           | 162.04           | 165.02           | 166.94           |
| 15             | 136.08          | 138.49          | 142.09           | 147.89           | 154.01           | 159.85           | 164.89           | 167.81           | 169.68           |
| 16             | 138.87          | 141.15          | 144.58           | 150.13           | 156.01           | 161.64           | 166.54           | 169.39           | 171.21           |
| 17             | 142.11          | 144.00          | 146.88           | 151.65           | 156.88           | 162.03           | 166.63           | 169.34           | 171.10           |
| 18             | 145.23          | 146.58          | 148.69           | 152.30           | 156.43           | 160.68           | 164.64           | 167.06           | 168.65           |
